# Supplementary material for: Understanding the Mn dissolution mechanism in rock salt-type Li4Mn2O5 cathodes
Source: Royal Society of Chemistry journal article supplement (doi:10.1039/d5ta02560e), 2025-01-01
Supplement: d5ta02560e1.pdf [file d5ta02560e1.pdf]

## Understanding the Mn Dissolution Mechanism in Rock Salt-Type $\text{Li}_4\text{Mn}_2\text{O}_5$ Cathodes

Monica Theibault,<sup>a</sup> Dennis Nordlund,<sup>b</sup> Chaochao Dun,<sup>c</sup> Jeffrey Urban,<sup>c</sup> Wei Tong,<sup>\*a</sup> and Marca Doeff<sup>\*a</sup>

\*corresponding authors

<sup>a</sup>Energy Storage and Distributed Resources Division, Lawrence Berkeley National Laboratory Berkeley, CA 94720, USA.

<sup>b</sup>Stanford Synchrotron Radiation Lightsource, SLAC National Accelerator Laboratory, Menlo Park, CA 94025, USA

<sup>c</sup>The Molecular Foundry, Lawrence Berkeley National Laboratory, Berkeley, CA 94720, USA.

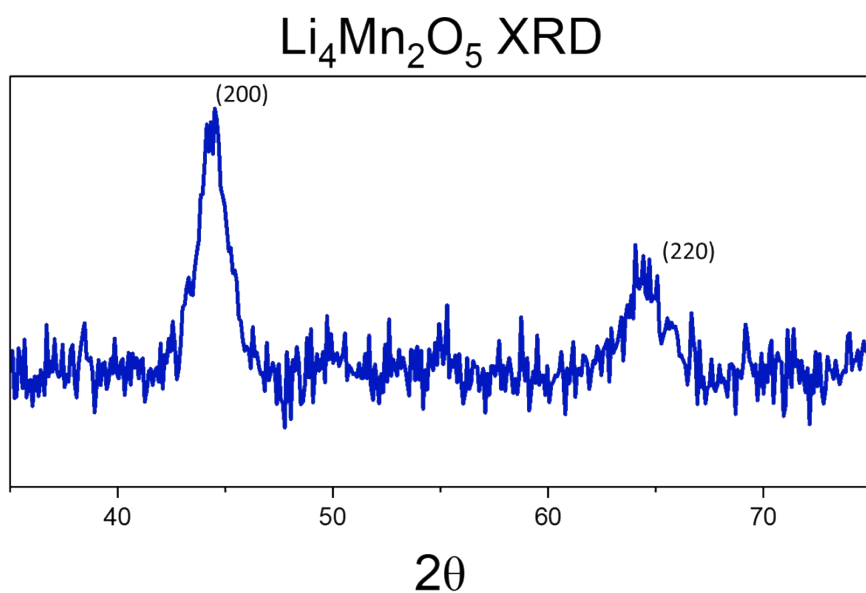

**Figure S1.** XRD pattern of as-synthesized LMO material. Miller indices were calculated using PowderCell software.

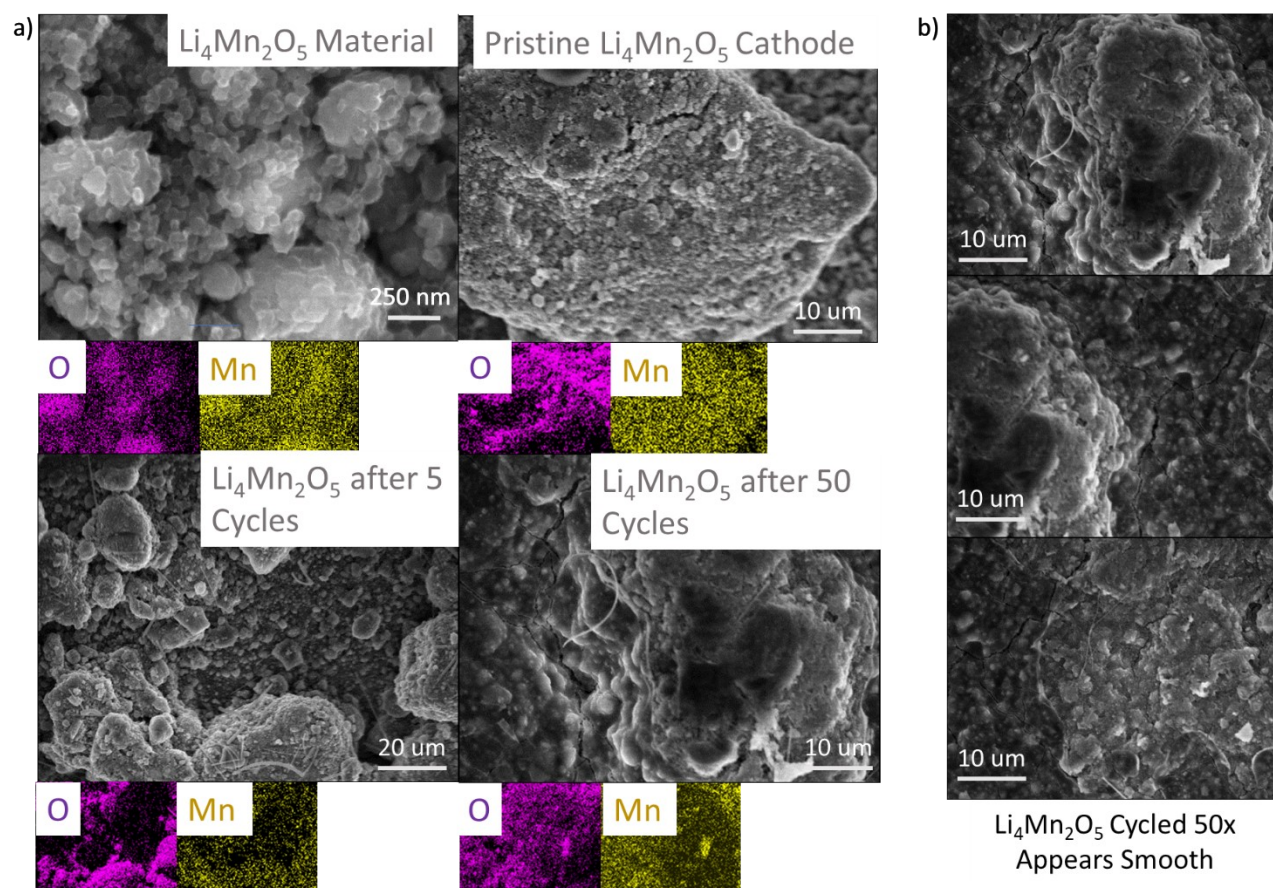

**Figure S2.** a) SEM and EDS elemental mapping of cathode after 50 cycles between 4.8 V and 2.0 V, after 5 cycles, before cycling, and of the pristine LMO material. b) Images of multiple spots on the cathode after 50 cycles.

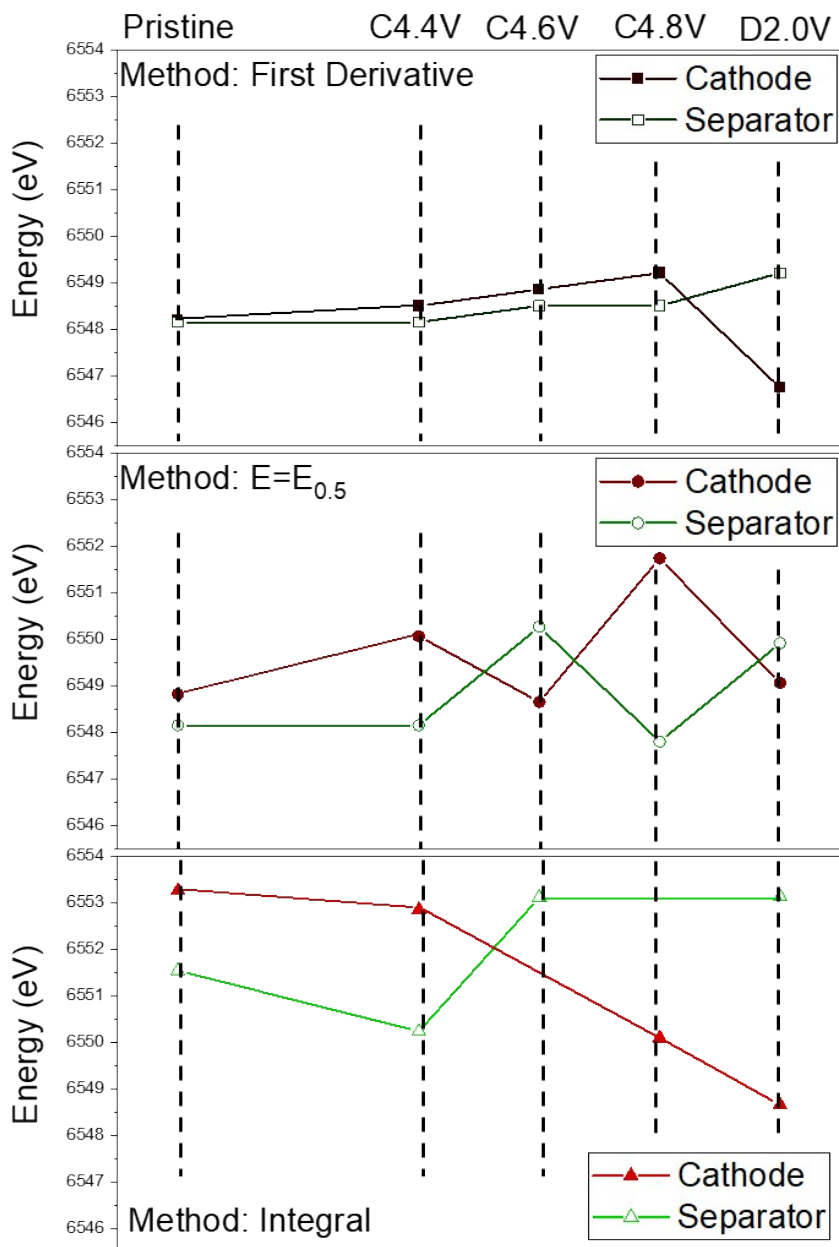

**Figure S3.** Comparison of three different methods of Mn K-Edge determination: first derivative,  $E=E_{0.5}$ , and integral. These methods did not yield significant differences. The analysis in the main text is based on the first derivative method. For a detailed explanation of the different methods, refer to the supporting information in Nam et al.<sup>1</sup>

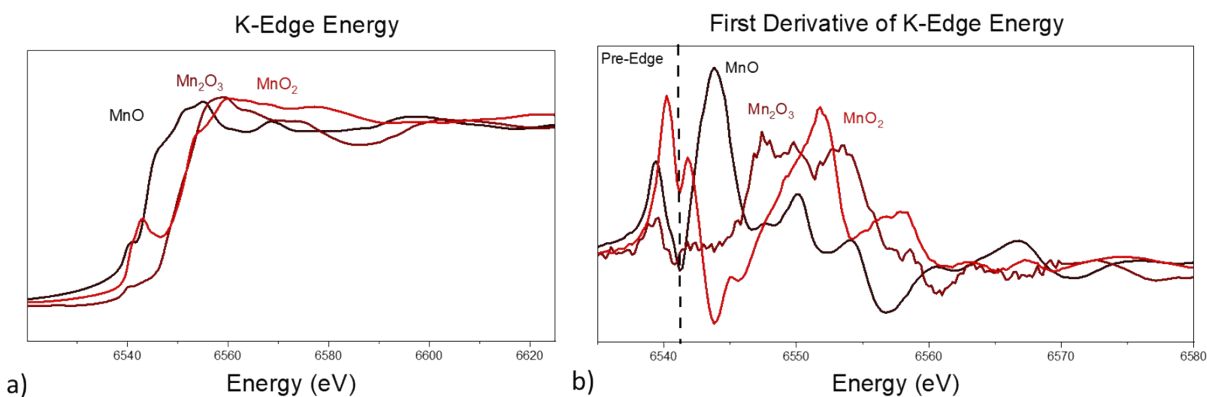

**Figure S4.** a) Hard XAS of Mn reference spectra for oxidation state determination, b) first derivative of Mn K-edge energy of Mn reference spectra.

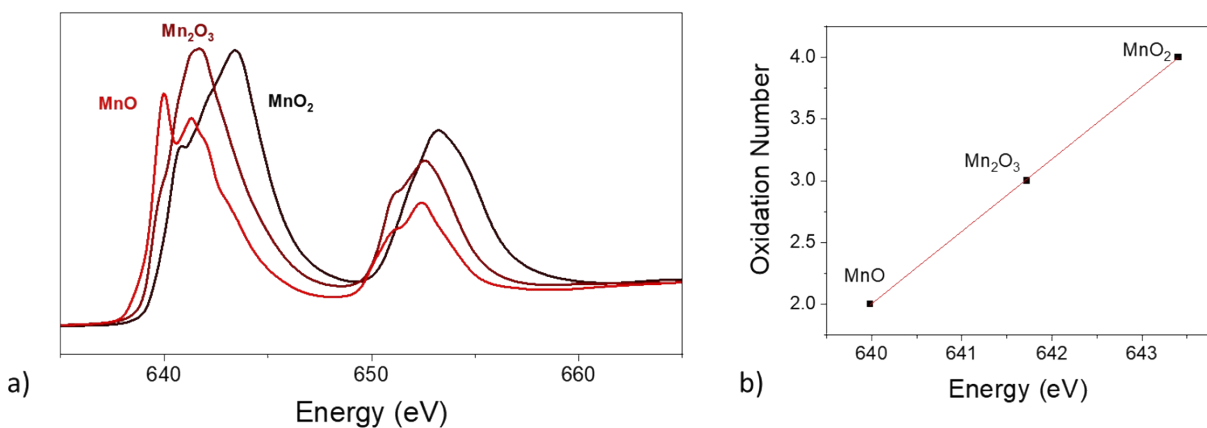

**Figure S5.** a) Soft XAS measurements of Mn reference spectra for oxidation state determination in TEY mode, b) plot of oxidation state versus Mn L-edge energy using linear combination analysis (LCA) fitting for the reference MnO, Mn<sub>2</sub>O<sub>3</sub>, and MnO<sub>2</sub> spectra.

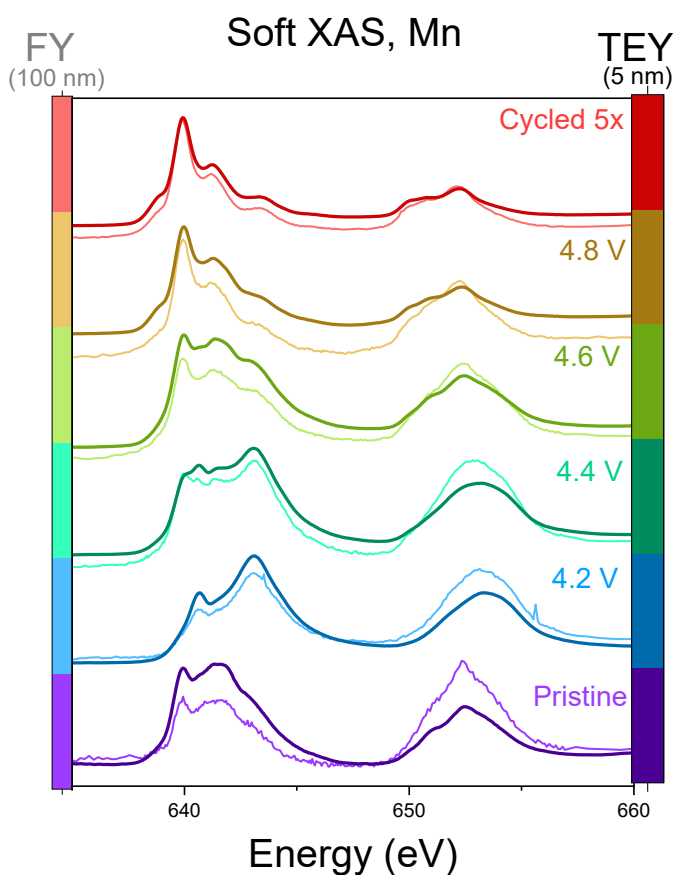

**Figure S6.** Soft XAS measurements of Mn at various states of charge and discharge in both TEY mode and FY mode.

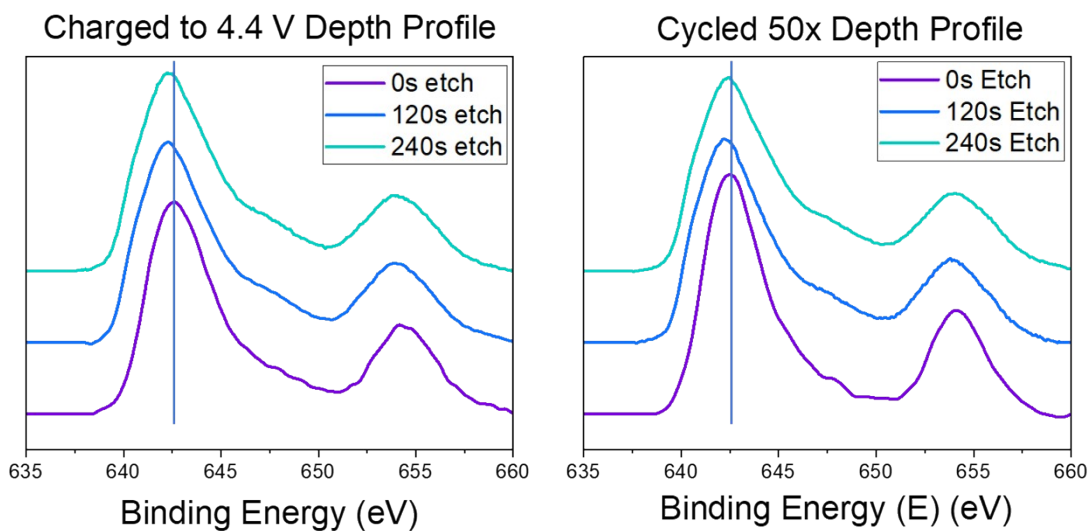

**Figure S7.** Mn XAS depth profiling measurements of the cell charged to 4.4 V and the cell cycled 50x. The vertical line, centered on the peak position of the measurement with no etching performed, serves as a guide for the eye.

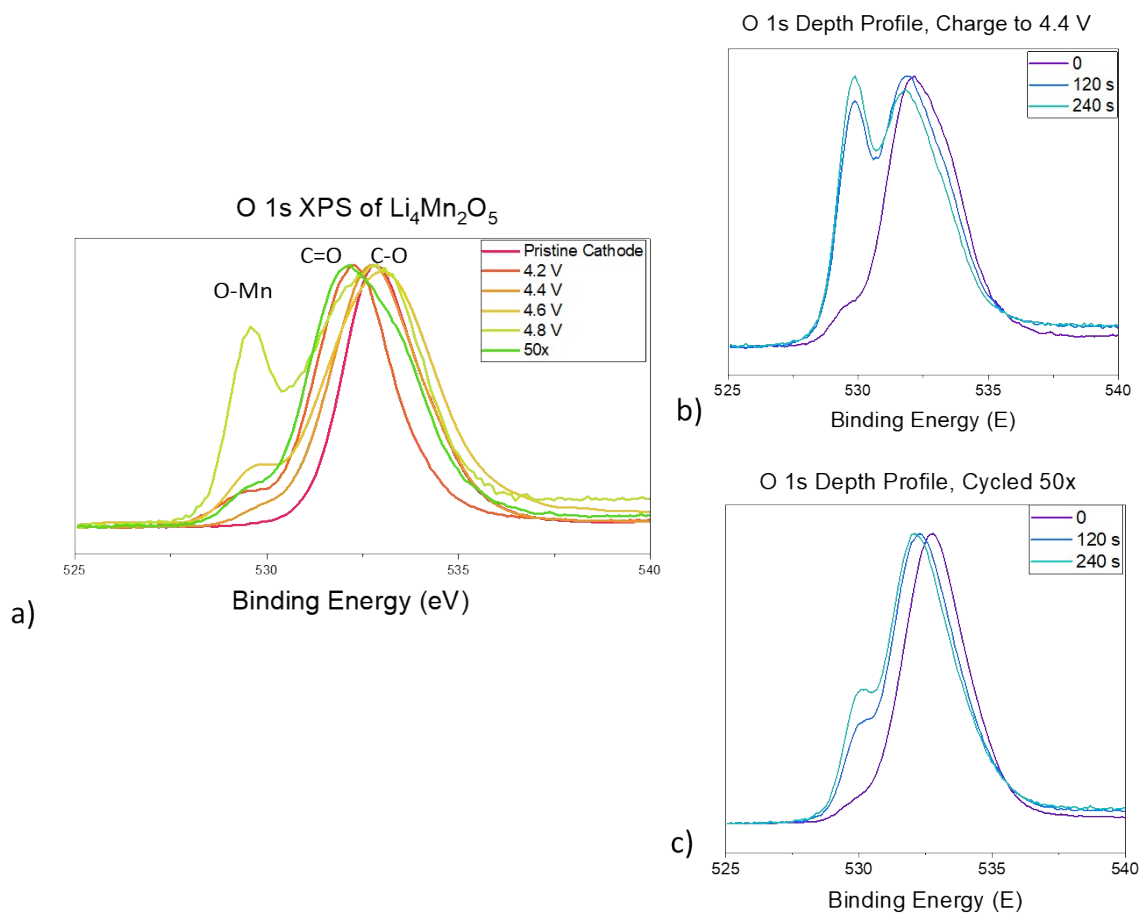

**Figure S8.** a) O1s XPS taken on  $\text{Li}_4\text{Mn}_2\text{O}_5$  cathodes extracted from half-cells at indicated points in the charging and discharging process and O 1s depth profiling measurements taken of the cells charged to 4.4 V (b) and cycled 50x (c).

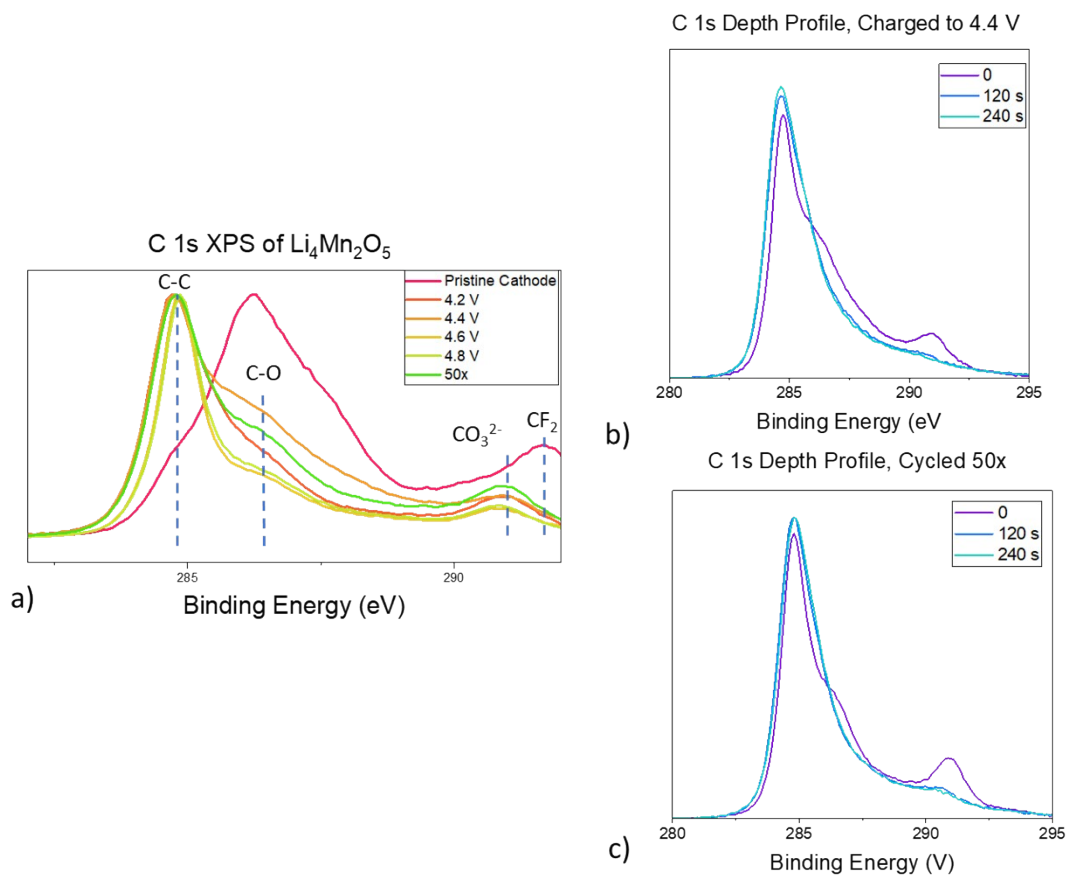

**Figure S9.** a) C 1s XPS taken on  $\text{Li}_4\text{Mn}_2\text{O}_5$  cathodes extracted from half-cells at indicated points in the charging and discharging process and C 1s depth profiling measurements taken of the electrodes charged to 4.4 V (b) and cycled 50x (c).

- 1 K. H. Nam, Z. Wang, J. Luo, C. Huang, M. F. Millares, A. Pace, L. Wang, S. T. King, L. Ma, S. Ehrlich, J. Bai, E. S. Takeuchi, A. C. Marschilok, S. Yan, K. J. Takeuchi and M. M. Doeff, *Chemistry of Materials*, 2024, **36**, 4481–4494.
